# Supplementary material
Source: publisher figshare collection journal article supplement (https://gsapubs.figshare.com/ndownloader/files/23306591)
Supplement: Supplementary file 1 [file 23306591]

## Sheet: TableDR1
Iceland Melt Inclusions
	Inclusion Size		Bubble size	Melt Inclusion														Host crystal											Melt Inclusion Volatiles							Melt Inclusion Trace Elements
Inclusion	long axis (µm)	short axis (µm)	diameter (µm)	SiO2 wt%	TiO2 wt%	Al2O3 wt%	FeOt wt%	FeO	Fe2O3	MnO wt% (LA)	MgO wt%	CaO wt%	Na2O wt%	K2O wt% (SIMS)	P2O5 wt% (SIMS)	total		SiO2 wt%	TiO2 wt%	Al2O3 wt%	Cr2O3 wt%	FeO wt%	MgO wt%	CaO wt%	Na2O wt%	total	Mg#		H2O wt%	CO2 ppm	F ppm	S ppm	Cl ppm	CO2 ppm bubb. corr.		Li ppm	Be ppm	B ppm	P ppm	K ppm	Sc ppm	Ti ppm	V ppm (LA)	Cr ppm	Co ppm (LA)	Ni ppm (LA)	Cu ppm (LA)	Zn ppm (LA)	Rb ppm (LA)
NAL 709 matrix glass				48.421	0.5633	14.264	9.7732	8.30722	1.63068		11.674	12.356	1.554			98.6055													0.00667053	208.738	16.8787	370.877	6.92096						190.501	280.93	37.63	2536		1610
Olivine Mount #2 (large olivines)
NAL 709 M2ol2-2	571	542	78	48.3575	1.0019	15.056	9.6526	8.20471	1.61056	0.144754	10.644	12.9305	1.679	0.000974426	0.000891746	99.4663		40.486	0.0032	0.07		10.197	48.684	0.265		99.7052	0.89487		0.105072	664.731	45.147	926.282	40.1587	1297	0.1297	2.14533	0.070803	0.566483	389.184	808.92	38.46	4904	202.558	358	45.6117	150.038	125.198	58.8003	1.37995
NAL 709 M2ol3-1	173	121	na	48.732	0.8514	14.284	9.0622	7.70287	1.51205	0.14268	10.712	14.097	1.46	0.000737012	0.000565153	99.3413		40.889	0.0027	0.067		9.716	49.493	0.282		100.45	0.900813		0.187989	683.45	59.004	872.866	25.6445		0.068345	2.24523	0.0853345	0.637315	246.649	611.831	42.03	3825	230.764	503	44.6028	151.995	123.165	56.5353	0.708674
NAL 709 M2ol3-2	305	276	36	48.7945	0.6751	14.224	9.307	7.91095	1.55289		10.779	14.0565	1.588	0.000837187	0.000831464	99.4241		40.889	0.0027	0.067		9.716	49.493	0.282		100.45	0.900813		0.160383	659.344	60.345	1006.41	38.6348	1104	0.1104	2.49387	0.0953168	0.63103	362.875	694.991	43.22	4469		364
NAL 709 M2ol3-3	372	327	50											0.000956212	0.000769527			40.889	0.0027	0.067		9.716	49.493	0.282		100.45	0.900813		0.14784	574.637	58.11	969.379	37.2902	1186	0.1186	2.40934	0.0866712	0.578628	335.843	793.8	43.52	3641		427
NAL 709 M2ol4-1	half-inclusion			48.309	1.0492	13.392	11.4724	9.75154	1.91419	0.167817	10.405	12.999	1.688	0.000842287	0.000585002	99.4824		40.489	0.0025	0.061		10.219	48.997	0.275		100.043	0.89527		0.148767	765.195	123.372	1044.65	28.9761		0.0765195	3.50531	0.20607	0.820594	255.312	699.224	41.79	5241	266.625	482	45.818	108.211	101.905	75.9224	0.887771
NAL 709 M2ol5-1	586	382	55	48.0575	1.1481	15.026	10.3294	8.77999	1.72348	0.150354	10.626	12.5365	1.748	0.000827169	0.00058684	99.6219		40.569	0.0031	0.068		10.837	48.875	0.266		100.618	0.88939		0.132587	502.723	61.686	997.908	40.0392	836	0.0836	3.25741	0.124983	0.951216	256.114	686.675	43.84	5313	212.974	489	46.6646	150.042	137.368	65.0279	1.25813
NAL 709 M2ol5-2	499	386	na	48.479	1.1395	13.594	11.2312	9.54652	1.87395	0.16593	10.688	12.584	1.782			99.6636		40.569	0.0031	0.068		10.837	48.875	0.266		100.618	0.88939		0.150623	796.034	121.584	992.445	26.4513		0.0796034	3.97384	0.238238	0.865437					261.284		48.3738	144.855	128.626	75.9679	0.918592
NAL 709 M2ol6-1	372	318	na	48.6045	0.7009	14.738	10.1926	8.66371	1.70066		10.693	12.9725	1.563	0.00061662	0.000559455	99.4645		40.085	0.0037	0.076		11.015	48.154	0.255		99.5887	0.886288		0.165976	608.574	97.446	907.465	29.26		0.0608574	2.44429	0.145185	0.80624	244.162	511.888	39.21	3876		416
NAL 709 M2ol6-3	723	646	na	48.9835	0.6794	14.577	10.2358	8.70043	1.70786	0.14887	10.675	12.9435	1.538	0.000864052	0.000586472	99.7811		40.085	0.0037	0.076		11.015	48.154	0.255		99.5887	0.886288		0.152943	494.778	97.893	973.021	42.7807		0.0494778	2.28291	0.133392	0.652942	255.953	717.293	39.9	3570	198.058	403	44.6603	150.167	130.98	63.9037	1.25453
NAL 709 M2ol7-1	490	419	na	48.889	0.7224	14.669	9.2098	7.82833	1.53667	0.142459	10.824	13.528	1.624	0.000594673	0.000523249	99.6087		40.609	0.0028	0.049		9.818	49.165	0.279		99.9228	0.899275		0.162712	450.875	67.944	918.391	20.8562		0.0450875	2.18896	0.0928589	0.620668	228.361	493.668	41.16	3972	212.414	398	46.4781	157.807	131.395	55.4586	0.629639
NAL 709 M2ol8-1	444	392	na	49.0485	0.5676	15.019	9.2332	7.84822	1.54058	0.140153	10.768	13.6795	1.44	0.000617986	0.000396618	99.896		40.552	0.0026	0.047		9.885	49.252	0.284		100.023	0.898818		0.138124	436.061	47.382	715.046	16.942		0.0436061	2.39124	0.0761284	0.506268	173.095	513.022	40.5	3115	194.601	406	45.7102	155.46	125.275	54.6756	0.511886
NAL 709 M2ol9-1	416	408	56											0.00142977	0.000893033														0.132126	660.422	82.248	945.706	74.5581	1222	0.1222	1.97502	0.113643	0.748743	389.745	1186.92	40.7	3681		290
NAL 709 M2ol11-1	387	335	54	48.298	0.8858	14.975	10.2808	8.73868	1.71537	0.153276	10.839	12.699	1.573	0.000784276	0.000842123	99.7039		40.432	0.0025	0.063		11.075	48.804	0.26		100.637	0.88709		0.145061	471.076	93.423	995.48	36.1324	1054	0.1054	3.1161	0.154326	0.69167	367.527	651.067	38.71	5074	221.688	356	46.9134	156.902	136.096	66.8623	1.12895
NAL 709 M2ol11-2	611	430	60	48.4635	0.9159	14.934	10.2358	8.70043	1.70786	0.170247	10.793	12.6335	1.603	0.000684921	0.000615879	99.7489		40.432	0.0025	0.063		11.075	48.804	0.26		100.637	0.88709		0.150159	353.778	95.211	977.27	22.6416	587	0.0587	3.069	0.151179	0.76471	268.787	568.588	39.11	4531	230.192	361	51.5267	166.397	136.608	64.6973	0.591604
NAL 709 M2ol12-1	355	200	na	48.702	0.7525	14.029	11.0908	9.42718	1.85052	0.166343	10.713	13.046	1.738	0.000919785	0.000597316	100.238		40.406	0.0028	0.073		10.939	48.665	0.265		100.351	0.888038		0.145987	615.442	121.584	931.745	25.7939		0.0615442	4.11514	0.227242	0.941024	260.686	763.56	42.28	4846	249.353	426	48.0649	153.064	130.362	73.2053	0.885862
NAL 709 M2ol12-2	309	268	na	48.8605	0.6536	14.653	10.1854	8.65759	1.69945	0.150522	10.585	13.0615	1.61	0.000628915	0.00037732	99.7595		40.406	0.0028	0.073		10.939	48.665	0.265		100.351	0.888038		0.117877	327.383	92.976	671.342	14.447		0.0327383	3.43837	0.189534	0.711628	164.673	522.094	42	3758	216.968	438	45.5071	161.873	139.078	67.0749	0.531982
NAL 709 M2ol13-1	667	637	na	48.8005	0.6149	14.802	9.9316	8.44186	1.65711	0.145424	10.913	13.4725	1.42	0.000873432	0.000412424	100.1		40.619	0.0025	0.066		10.627	49.197	0.28		100.792	0.891935		0.145987	362.397	57.216	707.155	13.7672		0.0362397	3.10123	0.110538	0.649799	179.993	725.08	42.14	3117	202.727	361	46.6602	153.966	131.901	60.9028	0.484965
NAL 709 M2ol13-2	191	153	15	48.766	0.6837	15.276	9.3502	7.94767	1.5601	0.155538	10.458	13.769	1.421	0.0010746	0.000430619	99.8794		40.619	0.0025	0.066		10.627	49.197	0.28		100.792	0.891935		0.149695	613.153	62.133	743.575	27.2132	769	0.0769	2.93514	0.112586	0.636126	187.934	892.08	41.89	3017	224.636	327	49.2834	162.082	146.086	56.6817	0.820753
NAL 709 M2ol13-3	401	320	na	49.0365	0.6063	15.016	9.6814	8.22919	1.61536	0.144659	10.707	13.6275	1.409	0.000884269	0.000531887	100.228		40.619	0.0025	0.066		10.627	49.197	0.28		100.792	0.891935		0.152015	700.015	62.133	861.94	35.2808		0.0700015	3.08883	0.115648	0.851848	232.131	734.076	41.91	3043	203.523	344	45.469	148.886	138.24	61.9465	1.2595
NAL 709 M2ol14-1	379	370	48	47.963	0.7611	15.049	9.9874	8.48929	1.66642	0.145239	10.605	13.202	1.584	0.000286135	0.000552839	99.2967		40.388	0.0025	0.079		10.847	48.404	0.258		99.9785	0.888343		0.158056	104.235	74.649	1002.76	4.1	181	0.0181	2.33497	0.109201	1.23828	241.275	237.535	37.94	4409	222.944	397	46.6304	151.854	129.346	65.7954	0.127387
NAL 709 M2ol15-1	337	228	9	49.676	0.5633	14.325	9.9028	8.41738	1.6523	0.152682	10.594	12.868	1.503	0.000392138	0.000378606	99.5848		40.109	0.0035	0.086		11.248	48.27	0.253		99.9695	0.884408		0.131205	148.541	72.861	842.516	6.81862	151	0.0151	2.07344	0.105579	0.695407	165.235	325.534	38.46	3155	182.338	413	47.73	155.264	166.076	63.8852	0.201535
NAL 709 M2ol15-2	473	383	na	49.5565	0.4816	14.658	9.9154	8.42809	1.6544	0.153208	10.527	12.8675	1.665	0.000701131	0.000293328	99.8242		40.109	0.0035	0.086		11.248	48.27	0.253		99.9695	0.884408		0.141359	248.062	79.119	730.828	12.8484		0.0248062	2.40909	0.118688	0.470512	128.017	582.044	40.96	2522	186.257	439	46.6274	153.998	167.376	63.8452	0.402517
NAL 709 M2ol16-1	125	124	19	48.631	0.9073	14.84	9.6454	8.19859	1.60935	0.153875	10.671	13.373	1.54	0.0010746	0.000768791	99.7616		40.213	0.0033	0.069		10.695	49.06	0.279		100.319	0.891049		0.150623	552.551	92.082	956.025	39.4042	1222	0.1222	2.78144	0.138933	0.750102	335.523	892.08	41.96	4386	237.506	434	43.9258	151.669	117.294	66.3792	1.12985
NAL 709 M2ol16-2	145	138	20	48.6905	0.7224	15.005	9.6958	8.24143	1.61776	0.142129	10.746	13.5875	1.496	0.000983533	0.000822642	100.085		40.213	0.0033	0.069		10.695	49.06	0.279		100.319	0.891049		0.143209	524.001	91.188	911.714	37.3873	1040	0.104	2.86077	0.147514	0.688697	359.024	816.48	41.25	4013	228.811	426	44.6472	152.603	121.263	64.7617	1.1517
NAL 709 M2ol16-3	417	396	55	48.643	0.8686	14.748	9.9856	8.48776	1.66612	0.149371	10.637	13.253	1.547	0.00118388	0.000810144	99.8316		40.213	0.0033	0.069		10.695	49.06	0.279		100.319	0.891049		0.1372	545.548	80.013	925.068	37.8206	1017	0.1017	3.01942	0.138997	0.687848	353.57	982.8	40.98	4693	223.3	420	46.2221	148.241	124.114	65.1652	1.21973
NAL 709 M2ol17-1	457	440	na	48.581	0.989	13.425	11.0062	9.35527	1.83641	0.168035	10.832	12.843	1.722	0.000861411	0.00061257	99.5662		40.376	0.0029	0.058		10.363	49.183	0.278		100.261	0.894309		0.140434	785.934	117.561	1014.3	27.7436		0.0785934	4.06308	0.249018	0.875628	267.343	715.1	43.88	5409	264.594	491	49.365	147.218	129.867	75.7201	0.946267
NAL 709 M2ol19-1	414	389	na	49.3305	0.6407	14.853	10.0576	8.54896	1.67813	0.150277	10.766	12.9665	1.585	0.000763513	0.00055339	100.35		40.733	0.0021	0.05		10.831	49.92	0.287		101.823	0.891508		0.129823	606.015	91.635	851.621	26.8845		0.0606015	3.31938	0.167327	1.78948	241.515	633.83	42.1	3834	207.305	441	46.6276	152.844	129.016	65.8617	0.918303
NAL 709 M2ol20-1	908	611	na	49.627	0.4429	14.813	9.2638	7.87423	1.54568	0.146237	10.873	13.568	1.367	0.000688564	0.000289652	100.101		40.649	0.0019	0.048		10.098	49.445	0.28		100.522	0.897224		0.120171	173.994	50.511	875.294	5.15953		0.0173994	2.28341	0.0820358	0.494632	126.413	571.612	40.16	2688	181.43	440	46.7947	149.452	133.11	60.9335	0.145859
NAL 709 M2ol21-1	half-inclusion			48.214	1.032	13.095	10.9864	9.33844	1.8331	0.137348	10.751	13.196	1.656	0.00105639	0.000660539	99.0677		40.493	0.0022	0.055		10.384	49.136	0.277		100.347	0.894027		0.0986918	352.431	118.902	928.71	28.513		0.0352431	2.69467	0.193372	0.755282	288.278	876.96	44.96	5305	210.35	481	42.7463	150.282	110.375	67.9037	0.340063
NAL 709 M2ol21-2	327	259	na	48.4655	0.5074	14.858	9.4564	8.03794	1.57782		10.76	13.5725	1.558	0.000774714	0.000310237	99.1778		40.493	0.0022	0.055		10.384	49.136	0.277		100.347	0.894027		0.167842	94.6865	84.93	815.808	4.35874		0.00946865	2.32109	0.123366	0.453781	135.396	643.129	43.15	3188		400
NAL 709 M2ol21-3	half-inclusion			48.519	0.6407	14.78	9.7696	8.30416	1.63008	0.142186	10.662	13.397	1.505	0.00119299	0.000615879	99.4155		40.493	0.0022	0.055		10.384	49.136	0.277		100.347	0.894027		0.13397	461.11	82.248	819.45	23.3886		0.046111	2.80375	0.139644	0.59502	268.787	990.36	45.1	3819	217.25	409	44.9102	153.098	114.016	64.2055	0.136778
NAL 709 M2ol22-1	133	103	na	48.8805	0.645	14.98	9.9082	8.42197	1.6532		10.526	13.4635	1.531	0.000867512	0.000534644	99.9342		40.491	0.003	0.071		10.916	48.956	0.268		100.705	0.888838		0.143209	543.932	85.824	886.22	23.777		0.0543932	2.85829	0.149023	0.563935	233.334	720.166	40.44	3604		385
NAL 709 M2ol23-1	471	266	na	48.331	0.9417	13.688	11.206	9.5251	1.86974	0.170328	10.749	12.723	1.702	0.000947106	0.000585553	99.511		40.414	0.003	0.071		10.856	48.619	0.268		100.231	0.8887		0.170178	734.625	137.676	1036.15	30.2535		0.0734625	3.90443	0.235866	0.762247	255.552	786.24	44.15	5298	261.004	506	49.9031	143.449	131.141	78.2981	0.92416
NAL 709 M2ol23-2	471	433	na	48.9335	0.7826	14.589	9.73	8.2705	1.62347	0.151507	10.764	13.3595	1.391	0.000947106	0.000679653	99.7011		40.414	0.003	0.071		10.856	48.619	0.268		100.231	0.8887		0.159917	656.786	79.566	880.757	39.2922		0.0656786	3.00703	0.136863	0.659651	296.62	786.24	39.65	3037	210.819	277	48.1074	143.944	129.22	65.93	1.3585
NAL 709 M2ol24-1	760	470	na	48.803	0.9073	15.373	9.7426	8.28121	1.62557	0.15045	10.083	13.302	1.723	0.000811779	0.000564601	100.084		40.421	0.0029	0.069		11.152	48.668	0.256		100.569	0.886112		0.0977816	194.194	74.649	722.33	23.3438		0.0194194	2.69219	0.123409	0.582365	246.408	673.898	41.6	4136	215.383	380	44.987	120.893	105.241	65.1019	0.839702
NAL 709 M2ol25-1	214	204	na	48.405	0.6106	15.103	9.3052	7.90942	1.55259	0.139069	10.617	13.566	1.453	0.000594764	0.000477485	99.1989		40.571	0.0024	0.062		10.245	49.524	0.282		100.686	0.896032		0.14645	522.924	48.276	821.271	18.1297		0.0522924	2.45297	0.0875336	0.610647	208.388	493.744	42.46	3173	203.854	403	44.1544	152.019	124.321	57.6122	0.625168
NAL 709 M2ol25-2	460	140	na	48.6555	0.9159	13.7	11.0422	9.38587	1.84241	0.165572	10.552	12.9575	1.666	0.000878349	0.000605586	99.6547		40.571	0.0024	0.062		10.245	49.524	0.282		100.686	0.896032		0.139972	730.585	118.455	970.593	25.5026		0.0730585	3.87716	0.229614	0.893464	264.295	729.162	43.08	5313	261.718	504	47.9374	145.639	127.907	72.9747	0.919845
NAL 709 M2ol26-2	504	405	na							0.164864				0.000701769	0.00056258			40.381	0.0025	0.066		9.954	49.092	0.286		99.7815	0.897886		0.162246	627.832	119.349	967.558	25.7939		0.0627832	2.52858	0.163791	1.1542	245.526	582.574	40.23	4659	250.483	565	48.977	152.981	129.441	77.4059	0.900321
NAL 709 M2ol26-3	79	64	na											0.000741201	0.000640506			40.381	0.0025	0.066		9.954	49.092	0.286		99.7815	0.897886		0.146913	664.731	115.773	949.955	25.8761		0.0664731	3.0219	0.19514	0.920641	279.535	615.308	39.41	5055		512
NAL 709 M2ol27-1	709	423	na	48.164	0.5891	14.574	10.387	8.82895	1.73309	0.157305	10.469	13.21	1.662	0.000380299	0.000449181	99.2124		40.334	0.0038	0.088		11.751	47.923	0.254		100.354	0.879095		0.151551	154.601	76.884	952.99	3.24945		0.0154601	2.1954	0.109007	0.677741	196.036	315.706	43.17	3606	218.355	413	50.0361	138.95	169.398	69.1666	0.10483
NAL 709 M2ol28-1	757	603	na	48.8185	0.7095	14.59	9.9406	8.44951	1.65861	0.156413	10.719	12.8025	1.608	0.000845292	0.000529497	99.3445		40.334	0.0028	0.071		11.171	48.724	0.267		100.57	0.886057		0.140434	487.371	92.976	935.994	24.1281		0.0487371	2.32481	0.137596	0.637145	231.088	701.719	40.98	3828	219.486	321	51.8339	160.337	144.723	66.1807	0.754828
NAL 709 M2ol28-2	408	358	49	48.709	0.7181	14.684	9.7426	8.28121	1.62557	0.152538	10.584	13.151	1.499	0.00136602	0.000892114	99.2402		40.334	0.0028	0.071		11.171	48.724	0.267		100.57	0.886057		0.144598	632.814	86.718	951.169	72.8848	1112	0.1112	2.48396	0.138566	0.807684	389.344	1134	42.98	3723	216.354	325	49.1167	138.993	157.176	65.9994	2.45133
NAL 709 M2ol28-3	505	453	60	48.9925	0.6536	14.565	10.0198	8.51683	1.67182	0.155552	10.456	13.0185	1.455	0.00143887	0.000671567	99.316		40.334	0.0028	0.071		11.171	48.724	0.267		100.57	0.886057		0.132126	749.304	87.165	908.072	62.875	1270	0.127	2.6798	0.148699	0.728275	293.091	1194.48	41.38	3474	214.72	321	49.8044	137.945	164.823	66.7392	2.10564
NAL 709 M2ol29-1	polished away			49.4765	0.4687	14.437	8.3278	7.07863	1.38951		10.734	14.2865	1.447	0.000896836	0.000474544	99.1775		40.406	0.029	0.076		11.001	48.645	0.26		100.417	0.887434		0.157591	538.949	49.617	697.443	22.7686		0.0538949	3.2698	0.0976237	0.578203	207.105	744.509	41.47	3545		372
NAL 709 M2ol29-2	polished away			48.105	0.8944	13.683	10.5814	8.99419	1.76553		10.581	12.801	1.754	0.000928892	0.000489248	98.3998		40.406	0.029	0.076		11.001	48.645	0.26		100.417	0.887434		0.155266	557.668	53.64	768.462	25.8387		0.0557668	3.35409	0.103078	0.58797	213.522	771.12	40.45	3523		364
NAL 709 M2ol29-3	polished away			48.6565	0.8643	14.132	10.693	9.08905	1.78415		9.142	13.6125	1.75	0.000808409	0.000438705	98.8503		40.406	0.029	0.076		11.001	48.645	0.26		100.417	0.887434		0.184699	615.981	63.921	767.248	29.0284		0.0615981	3.25741	0.0946268	0.550686	191.464	671.101	41.17	3545		399
NAL 709 M2ol29-4	polished away													0.000837642	0.000471604			40.406	0.029	0.076		11.001	48.645	0.26		100.417	0.887434		0.177663	615.307	59.451	810.952	26.5484		0.0615307	3.23757	0.0939585	0.523339	205.821	695.369	40.78	3490		362
NAL 709 M2ol30-1	392	374	53	48.3685	0.8385	14.791	9.8434	8.36689	1.64239	0.154463	10.722	13.2985	1.506	0.00109281	0.000937326	99.5224		40.463	0.0029	0.074		11.106	48.613	0.258		100.517	0.886415		0.142284	605.342	92.976	930.531	36.6926	1159	0.1159	3.5177	0.176231	0.7518	409.076	907.2	42.09	4172	222.337	400	48.012	151.088	145.833	68.2317	1.25801
NAL 709 M2ol30-2	139	97	16	48.629	0.7869	14.837	9.7912	8.32252	1.63368	0.158382	10.355	13.368	1.424	0.00110192	0.00090259	99.3495		40.463	0.0029	0.074		11.106	48.613	0.258		100.517	0.886415		0.137662	619.078	93.87	927.496	37.0736	1273	0.1273	3.43094	0.168233	0.696681	393.916	914.76	42.53	3959	227.964	422	44.7818	105.811	98.9641	70.9544	1.19662
NAL 709 M2ol31-1	116	102	15	48.926	0.817	14.882	9.3862	7.97827	1.56611	0.143039	10.681	13.035	1.626	0.000906125	0.000721557	99.4962		40.572	0.0027	0.066		10.866	48.977	0.265		100.749	0.889333		0.148767	526.425	86.718	819.45	30.6419	1025	0.1025	3.49539	0.169914	0.761228	314.908	752.22	41.66	4028	219.317	441	44.3743	136.657	123.903	63.2565	1.05369
NAL 709 M2ol31-2	478	348	53	48.8645	0.8213	14.685	9.5266	8.09761	1.58953	0.149658	10.645	13.2255	1.527	0.00109281	0.000760153	99.4446		40.572	0.0027	0.066		10.866	48.977	0.265		100.749	0.889333		0.129363	606.419	95.658	885.006	34.8924	1132	0.1132	3.27228	0.181966	0.736853	331.753	907.2	42.5	4471	221.848	454	46.56	153.635	137.513	64.7016	1.29709
NAL 709 M2ol31-3	half-inclusion			48.938	0.7482	14.615	9.5734	8.13739	1.59734		10.569	13.374	1.561	0.00104728	0.000756661	99.3786		40.572	0.0027	0.066		10.866	48.977	0.265		100.749	0.889333		0.16178	727.353	104.598	1002.16	35.6319		0.0727353	3.52266	0.193523	0.783904	330.229	869.4	41.46	4367		464
NAL 709 M2ol31-4	half-inclusion			48.4015	0.8213	13.662	10.6354	9.04009	1.77454	0.167439	10.713	12.8855	1.767	0.000983533	0.000567542	99.0531		40.572	0.0027	0.066		10.866	48.977	0.265		100.749	0.889333		0.16411	791.052	121.584	970.593	25.7117		0.0791052	3.59207	0.220128	0.780761	247.692	816.48	42.98	5104	253.421	506	48.8322	147.083	129.289	75.8219	0.908613
NAL 709 M2ol33-2	258	200	29	49.128	0.8127	15	9.1432	7.77172	1.52556	0.140553	10.836	13.522	1.651	0.00112013	0.0010658	100.233		40.765	0.0024	0.058		10.103	49.344	0.271		100.543	0.896989		0.151087	601.706	71.073	934.78	47.7482	1082	0.1082	2.26234	0.0965672	0.838684	465.144	929.88	42.49	4717	220.099	389	46.2185	154.007	114.004	56.1323	1.58488
NAL 709 M2ol33-3	103	91	na							0.146616				0.000670077	0.000550817			40.765	0.0024	0.058		10.103	49.344	0.271		100.543	0.896989		0.163178	543.259	74.649	866.796	18.6974		0.0543259	2.79135	0.127032	0.679185	240.392	556.265	43.44	4134	215.557	391	47.1579	154.924	133.796	56.376	0.618026
NAL 709 M2ol34-1	343	236	na	48.771	0.5719	14.712	9.4798	8.05783	1.58172	0.149411	10.612	13.297	1.466	0.000635289	0.000525454	99.0591		40.484	0.0029	0.068		11.012	48.672	0.259		100.498	0.887389		0.179538	471.21	76.437	929.924	23.2018		0.047121	2.53354	0.110754	0.701862	229.323	527.386	41	3519	195.626	397	46.733	146.797	130.614	66.9397	0.678935
NAL 709 M2ol34-2	545	481	na	47.9705	0.7052	14.102	10.5202	8.94217	1.75532	0.16594	10.455	12.5575	1.797	0.000784094	0.000485572	98.2733		40.484	0.0029	0.068		11.012	48.672	0.259		100.498	0.887389		0.198352	584.198	136.335	946.313	26.8995		0.0584198	3.18304	0.194536	0.827813	211.917	650.916	44.38	4551	245.097	583	48.9844	147.537	126.412	76.1119	0.854978
NAL 709 M2ol34-3	419	331	na	49.294	0.5461	14.641	9.4744	8.05324	1.58082	0.151074	10.743	13.167	1.41	0.000661426	0.000568277	99.4266		40.484	0.0029	0.068		11.012	48.672	0.259		100.498	0.887389		0.193636	642.376	75.543	880.757	30.866		0.0642376	2.71203	0.111702	0.576505	248.012	549.083	39.56	3220	192.746	385	47.8111	148.32	130.663	68.2089	0.902407
NAL 709 M2ol36-1	690	397	na	48.969	0.8901	13.501	10.5544	8.97124	1.76102	0.163945	10.727	13.108	1.717	0.000853943	0.000632787	99.6304		40.622	0.0027	0.046		9.963	49.358	0.279		100.271	0.898298		0.149695	476.328	124.713	942.671	27.4448		0.0476328	3.85732	0.22293	0.655235	276.166	708.901	43.84	4884	263.307	597	48.618	144.426	128.058	76.3651	0.860122
NAL 709 M2ol36-2	139	118	18	49.0805	0.5676	14.649	8.9218	7.58353	1.48862	0.150008	10.402	13.7815	1.552	0.000877166	0.000759234	99.1044		40.622	0.0027	0.046		9.963	49.358	0.279		100.271	0.898298		0.163644	563.594	62.133	941.457	33.742	1139	0.1139	2.55337	0.100599	0.582025	331.352	728.179	42.87	3861	234.218	479	46.7747	155.193	107.039	61.5156	1.0448
NAL 709 M2ol36-3	494	118	na	48.923	0.8514	13.439	10.6336	9.03856	1.77424	0.163237	10.567	13.041	1.695	0.000782	0.000652453	99.3132		40.622	0.0027	0.046		9.963	49.358	0.279		100.271	0.898298		0.188459	673.35	126.501	993.052	28.2515		0.067335	3.49539	0.206782	0.645383	284.749	649.177	43.3	4957	255.154	519	47.6926	140.541	128.205	72.9177	0.927576
NAL 709 M2ol36-4	139	124	na	49.1845	0.7267	14.569	8.7508	7.43818	1.46009	0.138598	10.445	13.7805	1.541	0.000476285	0.000467928	99.1361		40.622	0.0027	0.046		9.963	49.358	0.279		100.271	0.898298		0.163178	319.707	62.133	645.241	12.8559		0.0319707	2.79135	0.105536	0.50372	204.217	395.388	42.27	3574	214.87	460	43.3278	142.449	128.237	56.2774	0.38285
NAL 709 M2ol36-5	497	495	na	49.024	0.8256	13.773	10.1692	8.64382	1.69675	0.162572	10.768	13.025	1.701	0.000732914	0.00049421	99.4484		40.622	0.0027	0.046		9.963	49.358	0.279		100.271	0.898298		0.193636	559.15	123.819	916.57	24.9498		0.055915	3.44829	0.187464	0.575401	215.687	608.429	42.61	4281	249.526	642	47.9683	152.525	126.038	72.6598	0.797793
NAL 709 M2ol36-6	728	433	na	48.7145	0.9245	13.319	10.468	8.8978	1.74661	0.164079	10.754	13.1055	1.715	0.000717706	0.000655945	99.1646		40.622	0.0027	0.046		9.963	49.358	0.279		100.271	0.898298		0.190341	718.06	123.372	986.982	27.6465		0.071806	3.50283	0.2015	0.69804	286.273	595.804	42.14	4947	261.605	483	49.0356	143.249	129.104	72.911	0.866842
NAL 709 M2ol37-1	polished away			49.0075	0.6364	15.507	9.0082	7.65697	1.50304		9.526	14.0715	1.522	0.00130227	0.000710714	99.2786		40.432	0.0025	0.058		10.32	48.973	0.272		100.058	0.894298		0.133509	785.934	49.17	784.851	46.6277		0.0785934	2.9872	0.092708		310.176	1081.08	41.27	3428		379
NAL 709 M2ol38-1	657	300	na	48.7575	0.7955	14.512	9.9928	8.49388	1.66732	0.15749	10.708	12.8745	1.806	0.000751128	0.000428781	99.6038		40.567	0.0018	0.042		9.938	49.452	0.285		100.286	0.8987		0.178132	524.27	118.008	874.08	19.056		0.052427	3.6243	0.160838	1.80221	187.132	623.549	44.09	3982	231.211	387	46.193	160.425	126.743	66.1043	0.676864
NAL 709 M2ol38-2	74	74	na	48.959	0.3827	15.166	8.677	7.37545	1.44778		10.421	14.045	1.475	0.000574274	0.000498988	99.1257		40.567	0.0018	0.042		9.938	49.452	0.285		100.286	0.8987		0.157126	444.95	63.027	775.746	15.2089		0.044495	2.94753	0.127484	0.805476	217.773	476.734	40.9	2875		419
NAL 709 M2ol40-1	155	150	na	48.614	0.5031	14.799	9.3502	7.94767	1.5601	0.145807	10.49	13.575	1.486	0.000898202	0.000895422	98.9631		40.389	0.0024	0.061		10.907	48.613	0.257		100.229	0.888223		0.172515	944.575	88.059	983.947	42.4371		0.0944575	2.7145	0.135806	1.10749	390.788	745.643	41.9	3285	227.087	391	45.1868	128.718	118.039	68.7961	1.32929
NAL 709 M2ol40-2	1283	577	na	48.5885	0.6665	14.382	10.3474	8.79529	1.72648	0.159228	10.508	12.8575	1.696	0.000749306	0.000511119	99.2051		40.389	0.0024	0.061		10.907	48.613	0.257		100.229	0.888223		0.182352	561.305	124.713	927.496	24.0534		0.0561305	3.04669	0.166077	0.730228	223.067	622.037	42.97	4334	231.08	464	48.1287	147.733	124.237	71.3759	0.790365
NAL 709 M2ol41-1rerun	312	256	na	48.422	0.559	15.005	9.2134	7.83139	1.53727	0.147608	10.495	13.331	1.547	0.000500418	0.00058151	98.72		40.078	0.0028	0.073		10.791	48.705	0.266		99.9158	0.889466		0.160383	465.958	59.898	911.714	13.8344		0.0465958	1.39543	0.0987232	0.26685	253.788	415.422	40.82	4061	204.471	372	45.3228	162.425	131.947	65.3228	0.433398
NAL 709 M2ol42-1	427	399	na	48.6315	0.7095	13.412	10.711	9.10435	1.78715	0.171185	10.609	12.6745	1.759	0.000890735	0.000501561	98.6777		40.393	0.002	0.055		9.975	49.317	0.278		100.02	0.898112		0.199296	522.52	137.229	957.239	28.3188		0.052252	3.72594	0.227674	0.817536	218.896	739.444	43.87	4811	258.78	492	49.0902	142.462	128.192	76.5399	0.976479
NAL 709 M2ol42-2@2	297	162	na	49.218	0.5805	14.448	8.614	7.3219	1.43726	0.136597	10.812	14.179	1.527	0.000481385	0.000367763	99.5151		40.393	0.002	0.055		9.975	49.317			99.742	0.898112		0.156661	412.898	53.64	589.397	17.8533		0.0412898	2.72442	0.101634	0.735409	160.502	399.622	43.21	3115	213.936	430	43.1284	153.834	124.598	55.9307	0.663204
NAL 709 M2ol43-1	196	192	23	48.4175	0.7267	15.047	9.3862	7.97827	1.56611		10.436	13.6525	1.529	0.00111103	0.000838815	99.1949		40.591	0.0025	0.069		10.859	48.941	0.267		100.73	0.889324		0.174386	708.095	71.073	915.356	39.2399	1107	0.1107	3.06404	0.130826	0.805476	366.083	922.32	43.01	4266		388
NAL 709 M2ol44-1	347		40	48.969	0.6364	15.191	9.2152	7.83292	1.53758	0.146556	10.635	13.211	1.528	0.000693755	0.000709979	99.5322		40.453	0.0026	0.074		10.845	48.997	0.27		100.642	0.889563		0.190811	603.726	69.285	849.193	30.2909	916	0.0916	3.29955	0.110646	0.880724	309.855	575.921	41.56	3519	196.142	368	46.6527	150.814	146.512	64.7191	1.01231
NAL 709 M2ol44-2	94	93	na	49.2275	0.5719	15.361	8.839	7.51315	1.47481	0.143235	10.473	13.2165	1.6	0.000696305	0.000710163	99.4321		40.453	0.0026	0.074		10.845	48.997	0.27		100.642	0.889563		0.165509	705.805	60.792	675.591	31.0154		0.0705805	2.82358	0.089819	0.629501	309.935	578.038	39.62	3472	194.572	341	49.4866	218.249	138.148	61.7746	1.09424
CPX Mount #2 (large CPX)
NAL 709 M2 cpx1-1	194	159	na	48.2915	0.4945	14.162	9.1828	7.80538	1.53217	0.145122	11.737	12.7705	1.52	0.000447416	0.000702076	98.3034		51.817	0.148923	5.118	1.08329	3.399	17.796	19.975	0.227	99.5642	0.903237		0.131666	487.64	61.686	826.734	22.8433			1.75315	0.134685	0.560368	306.406	371.423	31.03	3058	180.6	187	49.5447	156.605	65.727	67.9983	0.619836
NAL 709 M2 cpx1-2	498	276	na	48.442	0.4773	13.56	9.136	7.7656	1.52436	0.146517	11.563	14.075	1.347	0.00040252	0.000590516	98.7468		51.817	0.148923	5.118	1.08329	3.399	17.796	19.975	0.227	99.5642	0.903237		0.143672	417.881	50.958	802.454	22.0514			1.76951	0.109266	0.616592	257.718	334.152	33.95	3399	200.816	493	48.0195	175.167	105.61	62.6835	0.628331
NAL 709 M2 cpx1-3	107	85	na	48.6375	0.6192	14.434	9.5968	8.15728	1.60125	0.148783	11.692	12.5355	1.644	0.000514624	0.000794889	99.3078		51.817	0.148923	5.118	1.08329	3.399	17.796	19.975	0.227	99.5642	0.903237		0.170178	994.269	64.368	809.738	35.7888			1.84809	0.149066	0.664238	346.913	427.216	31.99	3299	161.714	212	50.9796	124.202	69.4534	75.2012	1.03839
NAL 709 M2 cpx1-4	271	190	na	48.357	0.5719	14.257	9.406	7.9951	1.56941	0.141888	11.96	12.865	1.524	0.000436215	0.000659253	99.0828		51.817	0.148923	5.118	1.08329	3.399	17.796	19.975	0.227	99.5642	0.903237		0.11467	485.351	50.958	905.644	24.6659			1.88354	0.135311	0.512722	287.717	362.124	31.63	3252	179.557	233	50.2661	203.342	102.898	64.131	0.755838
NAL 709 M2 cpx1-5	263	183	19	48.7575	0.6665	14.393	9.307	7.91095	1.55289	0.141294	11.743	12.7085	1.617	0.000472824	0.000747472	99.3338		51.817	0.148923	5.118	1.08329	3.399	17.796	19.975	0.227	99.5642	0.903237		0.126142	579.889	54.981	842.516	29.3048	732		1.92098	0.147384	0.497265	326.218	392.515	31.09	3303	173.907	215	48.0089	148.417	70.4843	64.234	0.830117
NAL 709 M2 cpx1-6	913	344	na	48.328	0.5504	13.501	9.2008	7.82068	1.53517	0.144014	12.526	13.297	1.427	0.000468089	0.000531335	98.9742		51.817	0.148923	5.118	1.08329	3.399	17.796	19.975	0.227	99.5642	0.903237		0.124303	431.348	48.723	786.672	21.7825			1.95915	0.1172	0.447921	231.89	388.584	37.72	3435	194.675	504	50.1575	217.233	101.324	62.0621	0.667969
NAL 709 M2 cpx1-7	347	123	23	48.5915	0.5676	13.458	9.055	7.69675	1.51085	0.140254	12.459	13.0625	1.499	0.000502057	0.000730747	98.8329		51.817	0.148923	5.118	1.08329	3.399	17.796	19.975	0.227	99.5642	0.903237		0.167376	554.571	55.428	915.963	29.9398	990		2.31439	0.138415	0.827728	318.919	416.783	31.93	3608	188.701	454	48.1351	208.731	77.7228	62.0915	0.86787
NAL 709 M2 cpx2-1	579	163	na	47.947	0.5762	14.581	9.757	8.29345	1.62798	0.14842	11.726	12.529	1.513	0.000285498	0.000490902	98.7776		51.621	0.147411	5.057	1.20314	3.56	17.594	20.023	0.213	99.4185	0.898076		0.104616	268.936	47.829	827.341	10.3609			1.95618	0.104954	0.466775	214.244	237.006	31.63	3071	183.613	228	50.5163	193.833	111.374	65.062	0.32742
NAL 709 M2 cpx2-3	425	170	na	49.132	0.6622	13.49	9.6148	8.17258	1.60425	0.142593	12.296	13.019	1.5	0.000418457	0.000586656	99.8566		51.621	0.147411	5.057	1.20314	3.56	17.594	20.023	0.213	99.4185	0.898076		0.111467	412.629	46.041	803.061	16.5461			1.8476	0.11457	0.464142	256.034	347.382	35.16	3091	188.211	615	47.6557	176.163	93.7174	65.838	0.557964
NAL 709 M2 cpx2-4	135	115	na	48.1095	0.5289	14.627	9.4852	8.06242	1.58263	0.14321	11.678	12.5535	1.525	0.00032238	0.000498253	98.6503		51.621	0.147411	5.057	1.20314	3.56	17.594	20.023	0.213	99.4185	0.898076		0.116961	340.042	52.299	851.014	11.6009			1.74571	0.109007	0.991982	217.452	267.624	34.74	3022	177.189	359	50.0075	191.93	114.308	62.6369	0.324254
NAL 709 M2 cpx2-6	80	67	na	48.2845	0.6364	14.447	9.8326	8.35771	1.64059		11.87	12.6325	1.47	0.000496411	0.000599705	99.173		51.621	0.147411	5.057	1.20314	3.56	17.594	20.023	0.213	99.4185	0.898076		0.126142	540.161	55.875	1024.62	22.4996			1.80347	0.121146	0.481723	261.728	412.096	34.36	3035		447
NAL 709 M2 cpx2-7	525	230	na	48.991	0.4343	13.551	9.352	7.9492	1.5604	0.143079	12.21	13.099	1.432	0.000375928	0.000453225	99.2124		51.621	0.147411	5.057	1.20314	3.56	17.594	20.023	0.213	99.4185	0.898076		0.120629	420.44	47.829	790.314	18.8692			1.82157	0.0957264	0.46686	197.8	312.077	35.47	2840	200.667	516	48.7288	200.621	108.289	62.485	0.607986
NAL 709 M2 cpx2-8	164	115	13	48.3405	0.7224	14.135	9.6562	8.20777	1.61116	0.143408	11.799	12.5875	1.599	0.000709145	0.000751331	98.983		51.621	0.147411	5.057	1.20314	3.56	17.594	20.023	0.213	99.4185	0.898076		0.116961	714.828	54.087	877.115	40.5995	957		1.84686	0.158811	1.13297	327.903	588.697	36.56	3481	202.84	877	49.151	136.512	81.1614	67.6864	1.21008
NAL 709 M2 cpx2-9	74	31	na	48.617	0.5504	14.525	9.991	8.49235	1.66702		11.048	11.967	1.719	0.000465448	0.000583899	98.4174		51.621	0.147411	5.057	1.20314	3.56	17.594	20.023	0.213	99.4185	0.898076		0.115128	490.737	50.511	885.613	19.9598			1.79802	0.130632	1.16609	254.83	386.392	34.58	2909		436
NAL 709 M2 cpx2-11	46	38	na	48.422	0.6278	14.407	9.9082	8.42197	1.6532		11.226	12.298	1.584	0.000434394	0.000560742	98.473		51.621	0.147411	5.057	1.20314	3.56	17.594	20.023	0.213	99.4185	0.898076		0.109181	478.483	50.511	773.925	19.4295			1.81934	0.131193	0.729039	244.724	360.612	34.33	3090		293
NAL 709 M2 cpx2-12	174	127	na	48.5575	0.5848	14.519	10.0396	8.53366	1.67513	0.140213	11.464	12.4505	1.636	0.00045798	0.000544017	99.3916		51.621	0.147411	5.057	1.20314	3.56	17.594	20.023	0.213	99.4185	0.898076		0.103247	467.574	48.276	918.391	19.5565			1.75712	0.126687	0.495057	237.425	380.192	34.46	3277	177.737	293	47.1903	183.064	118.042	66.0388	0.606048
NAL 709 M2 cpx2-13	152	140	na	47.914	0.4386	14.572	9.9064	8.42044	1.6529	0.144206	11.797	12.715	1.513	0.000321652	0.000448998	99.0002		51.621	0.147411	5.057	1.20314	3.56	17.594	20.023	0.213	99.4185	0.898076		0.120171	341.254	59.004	923.854	12.6318			1.59648	0.10103	0.736258	195.955	267.019	34.85	3091	182.061	258	48.7314	194.547	122.565	64.8577	0.344218
NAL 709 M2 cpx3-1	499	228	na	48.1515	0.6235	12.191	10.819	9.19615	1.80517	0.164268	11.138	13.4875	1.543	0.000321652	0.000448998	98.1178		50.839	0.170943	6.018	0.835123	3.935	17.2	19.918	0.248	99.1641	0.886273		0.141821	454.781	120.243	829.162	23.777			3.32186	0.193415	0.519602	195.955	267.019			246.619		45.9644	131.925	115.315	74.018	0.695023
NAL 709 M2 cpx3-2	359	166	na	48.043	0.5977	13.14	10.3852	8.82742	1.73279	0.149568	11.635	13.002	1.564	0.000321652	0.000448998	98.5165		50.839	0.170943	6.018	0.835123	3.935	17.2	19.918	0.248	99.1641	0.886273		0.146913	350.546	101.469	720.509	16.927			3.56976	0.155275	0.459301	195.955	267.019			215.104		45.386	171.071	109.745	66.894	0.553811
NAL 709 M2 cpx3-3	184	120	na	48.6915	0.5891	13.997	9.226	7.8421	1.53938	0.140072	11.991	13.0195	1.477	0.000321652	0.000448998	99.1312		50.839	0.170943	6.018	0.835123	3.935	17.2	19.918	0.248	99.1641	0.886273		0.145061	416.13	65.709	773.318	16.8897			2.84341	0.135117	1.85827	195.955	267.019			198.207		46.3094	188.307	118.973	59.4768	0.532049
NAL 709 M2 cpx3-4	80	56	na											0.000271291	0.000713838			50.839	0.170943	6.018	0.835123	3.935	17.2	19.918	0.248	99.1641	0.886273		0.133509	566.422	69.285	815.201	19.9972			2.34166	0.150812	0.588225	311.54	225.212
NAL 709 M2 cpx3-5	60	56	na											0.000321652	0.000448998			50.839	0.170943	6.018	0.835123	3.935	17.2	19.918	0.248	99.1641	0.886273		0.131205	462.322	77.778	937.815	16.068						195.955	267.019
NAL 709 M2 cpx3-6	280	156	na	48.288	0.8385	12.187	10.7614	9.14719	1.79556		11.113	13.419	1.585	0.000622904	0.000615879	98.1919		50.839	0.170943	6.018	0.835123	3.935	17.2	19.918	0.248	99.1641	0.886273		0.149695	326.575	120.69	856.477	25.5474						268.787	517.104	41.35	4646		640
NAL 709 M2 cpx3-7	266	91	na	49.0705	0.6923	12.379	10.2286	8.69431	1.70666		10.897	13.6795	1.679	0.000592852	0.000531703	98.6259		50.839	0.170943	6.018	0.835123	3.935	17.2	19.918	0.248	99.1641	0.886273		0.126602	422.056	106.833	764.213	21.5285						232.05	492.156	41.35	4308		682
NAL 709 M2 cpx3-8	743	408	plucked	49.15	0.7267	12.197	10.2412	8.70502	1.70877		10.834	13.621	1.606	0.000321652	0.000448998	98.3759		50.839	0.170943	6.018	0.835123	3.935	17.2	19.918	0.248	99.1641	0.886273		0.13397	414.11	116.22	810.952	22.7686						195.955	267.019
NAL 709 M2 cpx3-9	260	156	na	48.7365	0.7998	12.549	10.4428	8.87638	1.7424	0.153429	10.828	13.7395	1.602	0.000321652	0.000448998	98.851		50.839	0.170943	6.018	0.835123	3.935	17.2	19.918	0.248	99.1641	0.886273		0.149695	477.54	118.902	826.734	22.6192						195.955	267.019			247.98		42.5455	124.802	110.816	68.8586	0.656007
NAL 709 M2 cpx3-10	140	113	na	47.982	0.6579	12.596	10.801	9.18085	1.80217		11.666	13.273	1.593	0.000589391	0.000550266	98.5689		50.839	0.170943	6.018	0.835123	3.935	17.2	19.918	0.248	99.1641	0.886273		0.158056	409.531	121.137	842.516	24.7257						240.152	489.283	40.34	4353		684
NAL 709 M2 cpx4-1	107	56	na	48.8845	0.4429	14.016	8.3134	7.06639	1.38711		12.366	13.7205	1.284	0.000387858	0.000386325	99.0273		52.735	0.068	4.588	1.36	4.115	18.785	19.431	0.173	101.255	0.890577		0.146913	420.844	75.99	691.98	20.0644						168.604	321.98	35.86	2524		268
NAL 709 M2 cpx4-2	554	167	na	48.836	0.5074	13.192	9.8236	8.35006	1.63909	0.14771	12.137	13.357	1.596	0.000439402	0.000487777	99.5967		52.735	0.068	4.588	1.36	4.115	18.785	19.431	0.173	101.255	0.890577		0.13951	429.463	80.46	828.555	17.9878						212.88	364.77	38.78	3481	213.321	454	47.0123	178.758	112.049	71.177	0.51074
NAL 709 M2 cpx4-3	167	111	na	48.6665	0.387	15.093	9.5176	8.08996	1.58803	0.141433	11.78	12.9515	1.187	0.000222661	0.000280095	99.724		52.735	0.068	4.588	1.36	4.115	18.785	19.431	0.173	101.255	0.890577		0.124303	314.589	80.013	500.775	12.6542						122.242	184.842	35.7	2538	185.05	155	48.9516	157.263	129.806	53.6956	0.369368
NAL 709 M2 cpx5-1	621	143	na	49.009	0.5074	13.391	9.4708	8.05018	1.58022	0.135057	12.067	12.919	1.367	0.000307172	0.000397537	98.8663		52.834	0.0739574	3.996	1.11647	3.322	18.572	19.873	0.159	99.9464	0.90882		0.109181	289.406	47.829	769.069	12.7662						173.496	254.999	37	2707	180.413	496	45.5596	180.537	98.9573	59.9616	0.399838
NAL 709 M2 cpx5-2	234	89	na	48.7455	0.4687	14.321	9.2674	7.87729	1.54628	0.134961	11.667	12.5545	1.482	0.000319557	0.000502113	98.6411		52.834	0.0739574	3.996	1.11647	3.322	18.572	19.873	0.159	99.9464	0.90882		0.108724	332.904	52.299	773.318	13.7149						219.136	265.28	34.45	2734	168.798	292	46.0721	148.279	79.2962	64.7187	0.425868
NAL 709 M2 cpx5-3	82	58	na	48.911	0.5891	14.398	10.3456	8.79376	1.72618		11.562	12.253	1.497	0.000340503	0.000622495	99.5557		52.834	0.0739574	3.996	1.11647	3.322	18.572	19.873	0.159	99.9464	0.90882		0.116044	366.572	52.299	805.489	13.8195						271.675	282.668	34.89	3426		238
NAL 709 M2 cpx5-4	1407	406	partially plucked	48.6575	0.5461	13.58	9.1774	7.80079	1.53127	0.135188	12.313	13.1995	1.391	0.000323928	0.000482815	98.9997		52.834	0.0739574	3.996	1.11647	3.322	18.572	19.873	0.159	99.9464	0.90882		0.112382	295.062	48.276	787.886	13.0426						210.714	268.909	36.49	2755	181.506	509	44.557	166.619	86.8208	60.129	0.401825
NAL 709 M2 cpx6-1	340	207	31	48.298	0.6278	13.878	10.1332	8.61322	1.69075	0.143397	11.699	12.579	1.62	0.000852942	0.000798933	98.9784		52.123	0.0983298	4.919	0.950731	3.654	18.089	19.764	0.21	99.8081	0.89823		0.100513	681.834	47.829	931.745	41.578	1150					348.677	708.07	35.28	4313	222.869	271	45.0508	155.481	93.4037	66.5979	1.27261
NAL 709 M2 cpx6-3	52	32	na	48.026	0.4343	15.105	9.7786	8.31181	1.63158	0.131071	10.89	12.277	1.586	0.000401154	0.000397904	98.228		52.123	0.0983298	4.919	0.950731	3.654	18.089	19.764	0.21	99.8081	0.89823		0.118336	578.946	53.64	867.403	20.804						173.657	333.018	34.79	2919	204.973	248	43.5079	162.364	88.7216	59.906	0.994908
NAL 709 M2 cpx6-4	97	36	na	48.5635	0.4472	14.307	9.4042	7.99357	1.56911	0.13593	11.915	12.6905	1.443	0.000418912	0.000415548	98.9063		52.123	0.0983298	4.919	0.950731	3.654	18.089	19.764	0.21	99.8081	0.89823		0.113755	560.901	53.193	878.329	20.4379						181.357	347.76	36.36	2903	191.7	262	46.8672	188.76	116.379	62.1185	0.603188
NAL 709 M2 cpx6-5	190	113	na	48.738	0.5504	13.231	9.4348	8.01958	1.57422	0.134248	12.181	13.029	1.515	0.000484026	0.000508178	98.8134		52.123	0.0983298	4.919	0.950731	3.654	18.089	19.764	0.21	99.8081	0.89823		0.116044	502.858	46.488	801.847	21.0505						221.783	401.814	37.44	3202	192.69	529	43.5809	167.243	87.6804	59.8692	0.652303
NAL 709 M2 cpx7-1	300	215	na	48.3815	0.6622	14.276	9.9154	8.42809	1.6544	0.138751	11.643	12.4165	1.69	0.000581104	0.000601359	99.1234		51.64	0.136989	5.27	1.23675	3.644	17.733	20.142	0.223	100.026	0.896653		0.100513	581.101	49.617	920.212	24.763						262.45	482.404	36.87	4125	196.12	269	44.1465	166.162	103.076	65.4534	0.779408
NAL 709 M2 cpx7-2	232	69	na							0.13178				0.000320104	0.00038798			51.64	0.136989	5.27	1.23675	3.644	17.733	20.142	0.223	100.026	0.896653		0.112382	286.308	47.829	878.936	10.8464						169.325	265.734	36.72	2604	182.667	287	45.4486	182.678	109.584	62.2621	0.360843
NAL 709 M2 cpx7-3	287	121	na	48.545	0.5117	14.38	9.6004	8.16034	1.60185	0.142553	11.494	12.636	1.644	0.00049377	0.000547876	98.9537		51.64	0.136989	5.27	1.23675	3.644	17.733	20.142	0.223	100.026	0.896653		0.110552	506.898	48.723	834.625	20.2437						239.109	409.903	36.66	3557	191.261	269	45.771	139.105	101.14	68.0815	0.631303
NAL 709 M2 cpx7-4	122	87	na	48.4485	0.5805	14.605	9.6814	8.22919	1.61536	0.125359	11.596	12.5185	1.604	0.000433301	0.000480058	99.1593		51.64	0.136989	5.27	1.23675	3.644	17.733	20.142	0.223	100.026	0.896653		0.104159	425.557	46.935	916.57	15.9634						209.511	359.705	36.62	3411	190.818	283	41.8722	218.823	74.0339	53.0115	0.403856
NAL 709 M2 cpx7-5	polished away		na											0.000516901	0.000571218			51.64	0.136989	5.27	1.23675	3.644	17.733	20.142	0.223	100.026	0.896653		0.106897	491.545	48.723	932.352	18.5032						249.296	429.106	35.79	3036		258
NAL 709 M2 cpx7-6	235	101	na	48.34	0.4601	14.293	9.892	8.4082	1.6505	0.139102	11.882	12.745	1.333	0.000377203	0.000372909	99.0842		51.64	0.136989	5.27	1.23675	3.644	17.733	20.142	0.223	100.026	0.896653		0.106897	254.661	49.617	736.291	10.0696						162.748	313.135	36.49	2936	183.494	283	46.6712	155.713	94.1546	64.6175	0.337462
NAL 709 M2 cpx7-7	284	152	na	48.438	0.4558	13.572	8.8354	7.51009	1.4742	0.131616	12.164	13.078	1.423	0.000463991	0.000373644	98.0978		51.64	0.136989	5.27	1.23675	3.644	17.733	20.142	0.223	100.026	0.896653		0.113297	318.899	45.147	741.754	18.5405						163.069	385.182	38.066	2737	195.051	503	44.0808	173.199	97.1058	60.5799	0.577081
NAL 709 M2 cpx7-9	43	25	na	48.7495	0.4773	11.957	8.9704	7.62484	1.49673		13.347	14.1615	1.062	0.000601685	0.000617165	98.7247		51.64	0.136989	5.27	1.23675	3.644	17.733	20.142	0.223	100.026	0.896653		0.109181	614.769	54.087	962.702	25.9284						269.349	499.489	36.87	4328		296
NAL 709 M2 cpx8-1	290	162	na	48.8095	0.5848	13.563	9.4456	8.02876	1.57602	0.128196	12.136	13.0025	1.338			99.0076		51.554	0.107	5.099	1.16	3.431	17.828	19.992	0.196	99.367	0.902573		0.111924	254.122	48.276	769.676	19.9823										191.451		44.0652	173.189	93.9842	58.8372	0.57984
NAL 709 M2 cpx8-2	301	79	na	48.885	0.5461	13.717	9.6922	8.23837	1.61716	0.138892	12.045	12.991	1.479			99.4942		51.554	0.107	5.099	1.16	3.431	17.828	19.992	0.196	99.367	0.902573		0.117877	394.583	48.723	850.407	20.8562										189.788		43.8967	168.017	94.8848	61.2625	0.635307
NAL 709 M2 cpx8-3	176	92	na	48.2655	0.5289	13.936	10.1764	8.64994	1.69795	0.136803	11.977	12.6735	1.562			99.2561		51.554	0.107	5.099	1.16	3.431	17.828	19.992	0.196	99.367	0.902573		0.11101	535.448	52.299	803.668	19.0634										192.844		45.7642	177.814	112.513	62.6379	0.570424
NAL 709 M2 cpx8-4	307	104	na	49.012	0.7912	12.274	10.6084	9.01714	1.77003	0.14908	11.112	13.416	1.652			99.0147		51.554	0.107	5.099	1.16	3.431	17.828	19.992	0.196	99.367	0.902573		0.143209	399.566	120.69	910.5	27.6016										255.142		41.3017	123.72	115.469	69.0124	0.778987
NAL 709 M2 cpx8-5	238	153	na	48.0555	0.7267	14.081	9.9136	8.42656	1.6541	0.137116	11.516	12.4465	1.653			98.5294		51.554	0.107	5.099	1.16	3.431	17.828	19.992	0.196	99.367	0.902573		0.120629	614.23	54.087	1002.76	29.0807										193.448		43.0162	158.814	99.7404	63.7333	0.806072
NAL 709 M2 cpx8-6	473	248	na	48.004	0.7955	13.78	10.396	8.8366	1.73459	0.138572	11.616	12.612	1.707			99.0491		51.554	0.107	5.099	1.16	3.431	17.828	19.992	0.196	99.367	0.902573		0.110552	722.639	50.958	895.325	41.5183										210.397		43.82	144.17	86.4294	65.3775	1.19838
NAL 709 M2 cpx8-8	196	106	na	48.3495	0.5289	14.241	9.946	8.4541	1.65951	0.138681	11.632	12.6845	1.511			99.0316		51.554	0.107	5.099	1.16	3.431	17.828	19.992	0.196	99.367	0.902573		0.129363	561.843	55.875	854.049	20.535										189.749		44.4447	171.909	109.987	62.9335	0.564435
NAL 709 M2 cpx9-2	151	96	na	48.9895	0.3526	14.319	9.1954	7.81609	1.53427	0.124941	11.694	12.6435	1.555			98.8739		52.26	0.079	4.773	0.956	3.714	18.218	19.736	0.231	99.967	0.897388		0.131666	599.281	59.451	803.668	26.272										172.81		41.4084	127.19	76.8888	60.4727	0.669833
NAL 709 M2 cpx9-3	polished away																	52.26	0.079	4.773	0.956	3.714	18.218	19.736	0.231	99.967	0.897388		0.138124	630.525	59.451	909.893	23.6425
NAL 709 M2 cpx11-1	174	174	na	48.768	0.4644	14.444	9.5734	8.13739	1.59734		11.366	12.6	1.635			98.8508		52.176	0.094	5.014	0.99	3.628	18.172	19.951	0.224	100.249	0.899296		0.112839	472.961	53.64	874.687	19.6237
NAL 709 M2 cpx11-2	134	77	na	48.0495	0.3741	14.161	9.8686	8.38831	1.6466		11.809	12.8135	1.417			98.4927		52.176	0.094	5.014	0.99	3.628	18.172	19.951	0.224	100.249	0.899296		0.128902	623.253	53.64	842.516	21.3866
NAL 709 M2 cpx12-1	175	98	na	48.373	0.4859	14.683	9.8614	8.38219	1.64539	0.139225	11.244	12.627	1.666	0.00045707	0.000409851	99.0795		51.056	0.185062	5.9	1.16032	3.855	17.244	19.719	0.257	99.3764	0.88858		0.105984	429.193	65.709	719.295	15.0969						178.871	379.436	37.28	3454	195.895	276	44.6857	140.232	99.0972	69.3627	0.488794
NAL 709 M2 cpx12-2	204	164	na	48.9745	0.6063	13.984	9.4654	8.04559	1.57932	0.132371	12.139	13.2325	1.54	0.000404797	0.000470501	100.074		51.056	0.185062	5.9	1.16032	3.855	17.244	19.719	0.257	99.3764	0.88858		0.125222	411.686	77.331	770.89	16.688						205.34	336.042	38.66	3329	194.459	422	42.3473	171.952	120.304	58.8281	0.496183
NAL 709 M2 cpx12-3	166	126	na	48.548	0.5977	13.971	9.4132	8.00122	1.57061		12.136	13.269	1.507	0.000383487	0.000489431	99.4419		51.056	0.185062	5.9	1.16032	3.855	17.244	19.719	0.257	99.3764	0.88858		0.119712	435.253	71.52	813.38	17.7413						213.602	318.352	37.19	3444		592
NAL 709 M2 cpx12-4	200	93	na	48.4315	0.4515	13.845	9.1054	7.73959	1.51925		12.149	13.0895	1.473	0.000290689	0.000345157	98.5449		51.056	0.185062	5.9	1.16032	3.855	17.244	19.719	0.257	99.3764	0.88858		0.144598	243.753	71.52	708.976	8.90424						150.636	241.315	38.13	2931		651
NAL 709 M2 cpx12-7	438	400	na	48.8395	0.7052	12.262	10.3402	8.78917	1.72528	0.148261	11.023	13.5715	1.575	0.000581741	0.000505972	98.4647		51.056	0.185062	5.9	1.16032	3.855	17.244	19.719	0.257	99.3764	0.88858		0.135816	415.996	111.303	808.524	22.4847						220.821	482.933	41.9	4326	246.989	642	40.0865	113.943	102.83	66.1987	0.692128
NAL 709 M2 cpx12-9	248	206	na	48.6465	0.6966	12.126	10.6462	9.04927	1.77634		10.897	13.6105	1.566	0.000532656	0.000530416	98.1888		51.056	0.185062	5.9	1.16032	3.855	17.244	19.719	0.257	99.3764	0.88858		0.138124	392.159	119.796	852.228	24.7481						231.489	442.184	40.79	4424		616
NAL 709 M2 cpx12-11	428	136	na	48.0165	0.5719	13.63	9.136	7.7656	1.52436	0.131615	12.077	13.4355	1.446	0.000424285	0.000484285	98.4445		51.056	0.185062	5.9	1.16032	3.855	17.244	19.719	0.257	99.3764	0.88858		0.118336	459.494	62.58	747.824	18.0625						211.356	352.22	37.15	3484	193.419	693	42.112	175.778	116.279	54.998	0.568676
NAL 709 M2 cpx12-12	389	298	na	48.361	0.7396	12.339	10.6696	9.06916	1.78024	0.152584	11.303	13.728	1.578	0.000521728	0.000388347	98.8708		51.056	0.185062	5.9	1.16032	3.855	17.244	19.719	0.257	99.3764	0.88858		0.144598	325.767	117.114	755.715	21.5958						169.486	433.112	39.99	4050	233.258	678	40.9702	120.124	102.68	68.645	0.653243
NAL 709 M2 cpx13-1	48	48	na	49.3235	0.4343	15.134	8.4412	7.17502	1.40843		10.263	14.3185	1.488	0.00025071	0.000224223	99.4025		51.698	0.122	5.18	0.978	3.673	17.713	20.195	0.221	99.78	0.895811		0.136277	141.538	56.322	629.459	7.40576						97.8574	208.127	36.99	2784		342
NAL 709 M2 cpx13-4	77	56	na	47.763	0.4859	14.106	10.0054	8.50459	1.66942		11.925	12.609	1.583	0.000497413	0.000442014	98.4773		51.698	0.122	5.18	0.978	3.673	17.713	20.195	0.221	99.78	0.895811		0.118336	663.788	54.981	855.87	21.2148						192.907	412.927	36.88	3173		263
NAL 709 M2 cpx14-2	211	146	19	48.21	0.6106	13.824	10.135	8.61475	1.69105	0.134252	11.816	12.659	1.721	0.000822525	0.000744347	99.1099		51.771	0.128	4.633	1.802	3.659	17.72	20.127	0.261	100.101	0.896203		0.111467	693.146	52.746	986.375	39.6732	1047					324.855	682.819	37.04	4167	208.266	309	42.8094	161.972	101.798	64.3767	1.18926
NAL 709 M2 cpx15-1	342	162	na	48.6765	0.4042	13.998	9.5644	8.12974	1.59584	0.127017	11.838	12.7695	1.375	0.000353708	0.000407094	98.7526		51.542	0.114	5.13	1.67	3.924	17.915	19.55	0.249	100.094	0.890587		0.0964169	302.603	46.488	795.17	11.5262						177.667	293.63	35.86	2790	175.174	330	42.1675	150.805	91.1212	57.5382	0.353507
NAL 709 M2 cpx15-2	145	66	na	49.086	0.4386	14.012	9.3934	7.98439	1.56731		11.881	12.86	1.472	0.000366457	0.000442933	99.143		51.542	0.114	5.13	1.67	3.924	17.915	19.55	0.249	100.094	0.890587		0.108724	319.437	51.405	783.03	12.7438						193.309	304.214	35.74	2672		290
NAL 709 M2 cpx15-4	261	139	na	49.111	0.4257	14.674	10.1728	8.64688	1.69735	0.132688	11.663	12.749	1.549	0.000373469	0.000410953	100.477		51.542	0.114	5.13	1.67	3.924	17.915	19.55	0.249	100.094	0.890587		0.101424	338.964	51.852	860.726	12.8484						179.352	310.036	35.71	3130	180.276	256	43.6553	165.782	107.062	61.7179	0.410636
NAL 709 M2 cpx15-5	154	89	na	48.3205	0.602	14.363	9.7534	8.29039	1.62737	0.13669	11.571	12.7385	1.566	0.000440313	0.000479323	99.0511		51.542	0.114	5.13	1.67	3.924	17.915	19.55	0.249	100.094	0.890587		0.102336	424.345	46.935	905.644	15.9858						209.19	365.526	36.22	3306	178.885	240	44.9213	173.092	96.1684	67.7587	0.564141
NAL 709 M2 cpx15-6	363	121	na	48.044	0.602	14.476	9.7588	8.29498	1.62828	0.132311	11.601	12.748	1.491	0.000333217	0.000400845	98.8531		51.542	0.114	5.13	1.67	3.924	17.915	19.55	0.249	100.094	0.890587		0.092327	244.157	47.382	754.501	9.53172						174.94	276.62	36.35	3222	179.591	253	42.3623	164.711	102.141	60.4852	0.311708
NAL 709 M2 cpx15-7	144	77	na											0.000454246	0.000427127			51.542	0.114	5.13	1.67	3.924	17.915	19.55	0.249	100.094	0.890587		0.107811	530.061	47.829	820.664	18.8618						186.41	377.093	37.12	3129		268
NAL 709 M2 cpx15-9	227	137	na	48.1295	0.4945	14.421	9.9388	8.44798	1.65831	0.132563	11.827	12.8425	1.552	0.000309631	0.000411321	99.3379		51.542	0.114	5.13	1.67	3.924	17.915	19.55	0.249	100.094	0.890587		0.0982366	270.013	50.064	801.24	9.55413						179.512	257.04	36.32	3062	175.762	248	42.7321	165.837	102.564	60.2242	0.330939
NAL709 Spinel Mount
NAL709M1sp1-1@1.ais	16.5	16.1	na	49.452	0.6511	13.552	9.1356	7.76526	1.52429		11.739	13.2658	1.692			99.4875			0.197257	35.8827	27.7932	10.3143	16.9336				0.745357		0.134322	674.499	88.3668	613.494	32.9714			3.22259			344.717	790.495	37.8538	3442.4		5874.1
NAL709M1sp1-2@2.ais	15.4	14.1	na																0.197257	35.8827	27.7932	10.3143	16.9336				0.745357		0.136951	677.835	93.0805	941.523	33.7294
NAL709M1sp1-3@3.ais	16.6	15.4	na																0.197257	35.8827	27.7932	10.3143	16.9336				0.745357		0.121866	724.339	90.7258	775.967	20.2049
NAL709M1sp2-1@4.ais	34.5	31.6	5	49.317	0.7009	13.386	9.6382	8.19247	1.60815		11.784	13.101	1.629			99.5561			0.212783	36.5929	27.6742	10.0089	17.2766				0.754749		0.11736	413.214	58.6707	603.161	17.0833	927		2.99582			190.312	659.009	35.3317	3367.39		4186.61
NAL709M1sp2-2@5.ais	55.4	53.8	8	49.5235	0.6407	13.355	9.2512	7.86352	1.54358		11.878	13.1575	1.667			99.4729			0.212783	36.5929	27.6742	10.0089	17.2766				0.754749		0.101704	593.896	61.2744	584.778	28.6382	1235		3.14331			313.881	698.194	34.9036	3527.1		410.477
NAL709M1sp3-1@6.ais	52	47.9	na	49.729	0.573	12.759	10.1087	8.59239	1.68666		12.482	12.612	1.298						0.229822	22.4784	42.2921	12.5349	14.1692				0.66836		0.046563	31.2502	58.7129	614.776	4.87234			2.78829			92.208	130.925	48.6066	2905.26		2078.17
NAL709M1sp3-2@7.ais	37.8	33.6	na																0.229822	22.4784	42.2921	12.5349	14.1692				0.66836		0.0519632	98.5454	53.7586	578.747	3.38312
NAL709M1sp4-1@8.ais	23.3	17.4	na																0.234933	33.1663	28.8115	11.5433	15.6647				0.707554		0.114171	296.509	114.662	767.726	21.1436
NAL709M1sp5-1@9.ais	43.5	40.3	na	49.8575	0.4472	11.525	9.8416	8.36536	1.64209		13.557	13.2815	1.255			99.7648			0.227535	19.5709	45.0461	11.625	14.3693				0.687866		0.125202	156.015	44.3733	672.531	5.28896			2.97784			116.353	146.737	39.7878	2811.99		12430.2
NAL709M1sp6-1a@10.ais	14.3	13.5	na																0.230194	22.8556	42.0754	11.6636	14.7642				0.692953		0.0931101	96.6071	75.2721	907.918	4.82983
NAL709M1sp6-2@11.ais	12.8	12	na																0.230194	22.8556	42.0754	11.6636	14.7642				0.692953		0.128007	131.169	66.8617	587.944	4.67892
NAL709M1sp6-3@12.ais	86.2	46.4	8.8	49.811	0.5805	12.449	10.2358	8.70043	1.70786		12.565	12.576	1.377			99.5943			0.230194	22.8556	42.0754	11.6636	14.7642				0.692953		0.147937	215.886	51.484	700.282	9.87649	492		3.77321			146.272	253.07	41.2291	2913.66		3097.98
NAL709M1sp7-1@13.ais	29.7	28.3	na	49.5395	0.4816	15.031	8.4142	7.15207	1.40393		11.132	13.6165	1.554			99.7688			0.135129	40.2656	24.9854	9.22051	18.2946				0.779611		0.11701	238.224	43.217	534.419	6.19928
NAL709M1sp7-2@14.ais	11.6	11	na	49.32	0.4902	14.82	8.1478	6.92563	1.35948		10.973	13.658	1.537			98.946			0.135129	40.2656	24.9854	9.22051	18.2946				0.779611		0.0876935	184.924	50.64	502.33	2.8743
NAL709M1sp8-1@15.ais	49	38.2	na	49.58	0.4967	12.261	9.8931	8.40914	1.65068		12.836	13.129	1.274			99.4698			0.233941	33.7968	29.2055	10.2848	16.6317				0.742475		0.141723	365.851	84.3958	699.56	11.2324			2.8803			239.766	384.672	37.5953	3768.23		4810.88
NAL709M1sp9-1@16.ais	20.8	15.2	na	49.629	0.4639	12.312	10.0017	8.50144	1.6688		12.784	13.012	1.318			99.5206			0.225262	21.0951	43.1947	12.396	14.0343				0.66871		0.113917	117.282	52.2731	569.815	4.60713			3.79214			77.8882	130.608	37.5607	2918.04		21444.2
NAL709M1sp9-2@17.ais	24.5	23.4	na																0.225262	21.0951	43.1947	12.396	14.0343				0.66871		0.12471	174.627	52.2563	726.247	6.95544
NAL709M1sp10-1@18.ais	25.8	21.7	na	49.413	0.7009	14.728	9.5086	8.08231	1.58653		11.308	13.039	1.652			100.35			0.19428	39.7913	23.627	10.007	17.5405				0.75758		0.111915	538.398	88.8859	752.706	35.644			3.17585			364.09	813.971	36.409	3633.39		11314.4
NAL709M1sp11-1@19.ais	16.1	10.1	na																0.15512	35.2537	29.5258	10.9389	16.6113				0.73027		0.0837075	421.727	44.4324	541.421	21.7304
NAL709M1sp12-1@20.ais	37.4	31.7	na	49.1145	0.3827	14.508	8.7742	7.45807	1.46399		11.351	13.4605	1.566			99.1569			0.130139	40.7634	24.0805	9.68645	18.017				0.768314		0.124575	370.601	44.7489	700.842	14.0533			2.69004			250.245	392.317	34.8774	2521.34		4254.55
NAL709M1sp12-2@21.ais	17.5	16.7	4.5																0.130139	40.7634	24.0805	9.68645	18.017				0.768314		0.124625	379.17	47.9265	609.939	15.1829	379.17
NAL709M1sp13-1@22.ais	75.7	68.2		49.1185	0.7697	13.579	9.595	8.15575	1.60095		11.648	13.1205	1.715			99.5457			0.225768	34.5148	29.0619	10.3635	16.7365				0.742218		0.110112	351.996	99.9971	774.41	10.8414			3.74021			178.493	254.37	35.2076	3737.28		340.638
NAL709M1sp13-2@23.ais	14.9	12.5	na																0.225768	34.5148	29.0619	10.3635	16.7365				0.742218		0.132999	183.321	103.487	707.106	4.20267
NAL709M1sp14-1@24.ais	42	40	na	49.5165	0.4214	12.912	9.298	7.9033	1.55139		11.832	12.6665	1.348			97.9944			0.222984	22.3041	42.8777	12.0531	14.493				0.681913		0.123048	156.148	50.0576	925.766	6.16447			3.30577			127.978	207.791	41.9787	2908.62		6158.59
NAL709M1sp15-1	23	22	na																0.171174	36.7479	27.6642	10.1752	17.2063				0.750926		0.10746	511.712	71.0015	647.504	36.014
NAL709M1sp16-1@26.ais	27	22	na																0.233149	23.3446	40.5602	14.3722	13.0419				0.618009		0.0838488	200.961	57.0164	698.859	10.0114
NAL709M1sp17-1@27.ais	33.3	22.2	na	48.4445	0.8385	13.3	10.8424	9.21604	1.80908		10.749	13.6125	1.691			99.4779			0.16692	33.5176	29.4452	11.4653	15.8668				0.711594		0.119989	209.145	113.742	787.1	21.703
NAL709M1sp18-1@28.ais	40	33.1	na	48.241	0.8743	13.31	11.073	9.41205	1.84755		10.993	13.487	1.693			99.6713			0.276314	30.584	29.3518	11.9202	14.8892				0.690109		0.125937	198.929	115.944	817.311	22.6557			3.56227			244.653	521.531	38.3658	4965.17		633.513
NAL709M1sp19-1	28.6	28.2	na	49.4	0.3827	14.83	8.479	7.20715	1.41474		11.011	13.422	1.486			99.0107			0.131325	39.8513	25.364	9.78919	17.8949				0.765212		0.114561	391.707	42.4068	810.766	17.107
NAL709M1sp20-1@30.ais	37.7	33.7	na	50.546	0.5074	11.73	8.6518	7.35403	1.44357		13.652	12.996	1.357			99.4402			0.224357	21.0097	44.9186	9.4912	15.9987				0.75033		0.134718	149.202	61.3039	650.603	10.4177
NAL709M1sp20-2@31.ais	33.4	30.8	na	50.5795	0.5074	11.722	8.4556	7.18726	1.41083		13.692	13.0525	1.37			99.379			0.224357	21.0097	44.9186	9.4912	15.9987				0.75033		0.122273	442.991	52.1339	564.205	8.35453			3.14608			93.655	190.793	43.1755	2924.18		14905.5
NAL709M1sp21-1@32.ais	23	22.7	na																0.213808	21.5147	45.1511	9.74298	15.9932				0.745328		0.118033	101.195	48.2473	681.156	4.29889
NAL709M1sp21-2@33.ais	16.7	15.6	na																0.213808	21.5147	45.1511	9.74298	15.9932				0.745328		0.124105	95.5359	48.1797	979.675	4.37036
NAL709M1sp21-3@34.ais	14.6	14.1	na																0.213808	21.5147	45.1511	9.74298	15.9932				0.745328		0.112526	105.109	53.6067	986.183	4.86135
NAL709M1sp21-4@35.ais	14.5	14.2	na																0.213808	21.5147	45.1511	9.74298	15.9932				0.745328		0.0999684	107.18	54.8895	807.32	7.57781
NAL709M1sp22-1@36.ais	11.4	11.1	na																0.371611	29.1877	34.4564	10.5439	16.0358				0.730567		0.123783	297.328	149.35	1077.09	19.5318
NAL709M1sp23-1@37.ais	37.2	36.6	na	50.19	0.4558	12.823	10.252	8.7142	1.71057		11.848	12.792	1.322			99.6828			0.227623	22.3138	42.1667	11.8978	14.5029				0.684865		0.08749	102.977	43.9133	487.03	3.38085			3.54171			103.34	134.559	40.2361	2901.63		3383.86
NAL709M1spSmpGl@38.ais	polished away																												0.112622	297.199	110.733	728.328	19.7364
NAL709M1sp24-1@39.ais	21.7	17.5	na																0.173146	33.5051	30.3895	11.6675	15.8577				0.707872		0.0754922	191.413	114.189	746.69	23.7345
NAL709M1sp25-1@40.ais	32.1	27.8	na	49.207	0.7396	14.056	9.6778	8.22613	1.61476		11.192	13.092	1.631			99.5954			0.215649	35.7721	27.2782	10.7213	16.5974				0.734044		0.131009	486.832	83.0876	778.178	14.928			3.45796			218.609	388.404	36.7845	3730.85		6386.19
NAL709M1sp26-1@41.ais	17.2	16.9	na	50.0615	0.8041	13.137	9.7534	8.29039	1.62737		11.635	12.1385	1.54			99.0695			0.349515	28.8062	34.528	10.3646	16.0604				0.73423		0.12825	590.136	128.385	698.662	42.2909
NAL709M1sp27-1@42.ais	116.6	85.6	na	48.2445	0.8987	13.35	10.9936	9.34456	1.8343		10.669	13.5975	1.65			99.4033			0.353028	30.9779	28.3185	11.0539	15.3929				0.712869		0.122437	481.649	110.142	826.492	21.1762			3.42648			240.876	502.814	37.9586	4817.96		420.375
NAL709M1sp28-1@43.ais	47.6	38.8	na	49.722	0.6536	13.904	8.9794	7.63249	1.49823		11.13	12.944	1.634			98.967			0.197747	35.917	28.3777	10.5268	16.8843				0.740908		0.115794	609.397	82.8048	692.502	30.7044
NAL709M1sp28-2@44.ais	14.9	11.9	na																0.197747	35.917	28.3777	10.5268	16.8843				0.740908		0.113165	213.64	85.6027	672.759	7.89504
NAL709M1sp29-1@45.ais	43.4	43.4	na	48.9185	0.516	13.463	9.8614	8.38219	1.64539		11.64	13.0865	1.524			99.0094			0.197928	32.9216	30.4751	10.732	16.3024				0.730333		0.130692	531.779	79.6103	1011.55	18.7556
NAL709M1sp29-2@46.ais	35.1	28.2	na																0.197928	32.9216	30.4751	10.732	16.3024				0.730333		0.0948628	628.957	136.652	949.376	28.0215
NAL709M1sp30-1@47.ais	10.3	9.6	na																0.150141	35.8789	29.1851	9.78173	17.4241				0.760526		0.114527	468.627	46.0571	738.563	17.7835
NAL709M1sp30-2@48.ais	12.6	10.4	na																0.150141	35.8789	29.1851	9.78173	17.4241				0.760526		0.124167	458.595	47.6987	766.822	18.1635
NAL709M1sp30-3@49.ais	14.5	13.3	na																0.150141	35.8789	29.1851	9.78173	17.4241				0.760526		0.116444	483.379	47.5889	774.312	18.627
NAL709M1sp13-1@50.ais	polished away																												0.116178	347.129	104.555	717.969	9.75444
NAL709M1sp31-1@51.ais	17	15.3	na																0.162837	39.1271	24.8148	9.57915	17.7858				0.767998		0.138314	519.406	80.9818	790.556	24.2678
NAL709M1sp32-1@52.ais	35	19.2	na																0.217736	18.5435	46.7014	11.3369	14.5028				0.695193		0.0533117	77.0463	31.6954	601.666	4.41491
NAL709M1sp33-1@53.ais	20.2	14	na																0.198281	17.0883	49.1179	10.9303	14.6991				0.705677		0.0949589	83.4583	41.567	723.102	4.37898
NAL709M1sp34-1@54.ais	15.4	14.4	na	49.552	0.3225	13.72	9.7174	8.25979	1.62137		10.856	13.259	1.561			98.9879			0.215401	20.6448	44.9707	9.62736	15.8339				0.745693		0.112091	136.417	53.8303	579.479	8.63199
NAL709M1sp35-1@55.ais	30.2	26.9	na																0.206028	20.6397	45.9967	11.8253	14.6173				0.687873		0.0998892	76.6817	50.0365	602.834	3.30071
																												avg	0.131215
																												2se%	0.0284472
[truncated: 22 more columns]

## Sheet: TableDR2
Table DR2. Published MORB data for samples in the upper 10% of CO2/Nb ratios (ranked)
				Major Elements wt%
Sample_ID	IGSN	Material	Basin	SiO2	TiO2	Al2O3	FeOT	MnO	MgO	CaO	Na2O	K2O	P2O5	Sum
END0113-013-001	URI901304	GL	Pacific	48.91	1.5	17.11	8.7	0.04	8.15	11.75	3.54		0.17	99.87
END0113-038-011	URI901382	GL	Pacific
END0113-030-010	URI901357	GL	Pacific
ENV7123-3-5		GL	Pacific	50.23	1.1	16.44	8.51		8.62	12.37	2.62	0.017	0.065	99.972
END0113-030-001	URI901355	GL	Pacific	50.34	1.93	15.11	10.34	0.2	7.25	11.28	3.09	0.01	0.28	99.83
END0113-040-001	URI901386	GL	Pacific	50.23	1.11	15.33	9.31	0.16	8.43	13.1	2.54		0.1	100.31
END0113-005-010	URI901272	GL	Pacific
END0113-026-010	URI901347	GL	Pacific
EN113 28D-1g		GL	Pacific	49.31	1.32	16.43	9.01	0.16	8.55	12.31	3.02	0.0132956	0.02	100.143
ALV0981-R023		GL	Pacific	48.93	1.22	16.24	8.16	0.16	8.88	12.02	2.77	0.045	0.105	98.53
EWI0004-002-001		GL	Pacific	49.496	0.796	15.852	9.751	0.178	9.317	12.758	1.741	0.033	0.056	99.978
END0113-026-001	URI901344	GL	Pacific	47.9	0.82	17.96	9.51	0.15	9.92	11.36	2.79		0.01	100.42
EN112 7D-2		GL	Pacific	49.91	1	15.6	9.35		8.43	13.17	2.06	0.04	0.09	99.65
NHOCHEP-116-003		GL	Pacific	49.31	1.15	16	8.97	0.17	8.94	12.21	2.35	0.05	0.1	99.25
SON0026-178-K146G		GL	Pacific	50.4	1.58	14.5	8.8	0.18	7.35	11.61	2.97	0.1	0.14	97.63
	Volatile Elements ppm							Trace Elements ppm
Sample_ID	H2O wt%	CO2 ppm	F ppm	S ppm	Cl ppm	CO2/Nb		Li	Be	P	K	Sc	Ti	V	Cr
END0113-013-001	0.14	147			90	396.226						37.72	8615	236.6	446.4
END0113-038-011	0.094	244				370.821						44.18	6847	328.9	194
END0113-030-010	0.071	199			29	365.809						42.74	6294	279.6	393.6
ENV7123-3-5	0.06	71.5299				335.413						36.8304	5780.96	213.407
END0113-030-001	0.072	172			46	322.702						41.39	4471	275.1	396
END0113-040-001	0.09	198			22	312.303						48.02	5309	256.9	414.8
END0113-005-010	0.092	294			12	307.531						42.41	6260	272.2	378
END0113-026-010	0.08	129			45	288.591						34.7	4634	173.2	339.9
EN113 28D-1g	0.109237	85.0677				260.387						29.8621	5624.17	129.534
ALV0981-R023	0.19	347			41	259.342		5	0.53		433	37.3		244	333
EWI0004-002-001	0.075	173	130	960		247.143						42.4		286	446
END0113-026-001	0.08	98			72	245.614						35.28	4203	169.9	347.5
EN112 7D-2	0.059	77.3671				193.754						41.1584	5834.99	261.947
NHOCHEP-116-003	0.11	262	140	1058	71	190.407		5.78	0.4	449	410	33	7105	272	377
SON0026-178-K146G	0.3	370	150	1368		185									140
Sample_ID	Co	Ni	Cu	Zn	Rb	Sr	Y	Zr	Nb	Cs	Ba	La	Ce	Pr	Nd
END0113-013-001	47.33	232.3	76.9	78	0.115	127.2	29.75	90.3	0.371	0.01		1.67	8.19	1.61	9.37
END0113-038-011	44.74	75.4	64.9	95.1	0.24	68	34.8	68.1	0.658	0.008	4.7	1.6	5.79	1.21	7.2
END0113-030-010	44.08	102.5	81.6	75.6	0.34	62.7	25.7	46.8	0.544	0.012	0	0.79	4.75	0.91	5.46
ENV7123-3-5		119.677			0.0434807	74.118	23.0068	44.4922	0.213259		0.644252	0.93	3.92835	0.807412	5.46346
END0113-030-001	45.93	140.4	75.4	80.9	0.3	65.3	27.3	48.6	0.533	0.009	5.1	1.2	4.26	0.92	5.43
END0113-040-001	45.92	107.8	103.2	72.6	0.29	97.5	26.85	58.05	0.634	0.01	2.45	1.5	6.03	1.14	6.28
END0113-005-010	46.97	144.5	87.5	73.6	0.16	107.1	25	59.9	0.956	0.018	5.4	1.87	6.56	1.11	6.08
END0113-026-010	56.92	298.3	101	67.3	0.19	97.9	20.9	40.6	0.447	0.01		0.78	4.42	0.76	4.11
EN113 28D-1g		51.6483			0.0601155	109.111	24.9266	66.3689	0.326698	0.00103469	0.839932	1.36	4.53589	0.975992	5.90645
ALV0981-R023	44.3	122.8	83.1	68.6	0.61	140.665	28.868	85.452	1.338	0.00752	7.619	2.289	8.316	1.517	8.436
EWI0004-002-001	50.3	175		75.9	0.28	43.7	22.3	35.6	0.7		4.05	1.05	3.51	0.705	4.07
END0113-026-001	56.04	271.8	99.8	68.7	0.11	101.1	20.8	42.5	0.399	0.009	3.25	1.11	3.8	0.7	3.89
EN112 7D-2		73.9969			0.0396575	66.8404	23.8763	44.3023	0.399305		0.622553	1.074	4.08216	0.796338	4.98793
NHOCHEP-116-003	44.4	125.9	78.8	71	0.381	81.781	28.356	65.708	1.376	0.00588	4.317	1.886	6.327	1.205	6.917
SON0026-178-K146G	43	55	80	92	2	133	38	116	2		14
Sample_ID	Sm	Eu	Gd	Tb	Dy	Ho	Er	Tm	Yb	Lu	Hf	Pb	Th	U
END0113-013-001	3.37	1.27	4.08	0.78	5.15	1.11	3.18	0.49	2.94	0.437	2.37	0.435	0.016	0.005
END0113-038-011	3.01	1.12	4.38	0.853	5.68	1.27	3.71	0.66	3.6	0.533	2.1	0.31	0.064	0.015
END0113-030-010	2.26	0.89	2.97	0.624	4.35	0.98	2.87		2.72	0.413	1.52	0.62	0.038	0.014
ENV7123-3-5	2.35278	0.937028	3.50698	0.57029	4.10484	0.883001	2.58992	0.347571	2.40885	0.367851	1.48117	0.190785	0.0137454	0.00591283
END0113-030-001	2.27	0.9	3.47	0.651	4.34	0.97	2.84	0.51	2.72	0.405	1.5	0.387	0.061	0.012
END0113-040-001	2.41	0.975	3.32	0.65	4.47	1	2.99		2.83	0.439	1.59	0.275	0.036	0.014
END0113-005-010	2.33	0.88	3.23	0.555	4.04	0.9	2.65		2.57	0.397	1.58	0.195	0.065	0.018
END0113-026-010	1.6	0.75	2.39	0.487	3.33	0.77	2.27		2.25	0.352	1.07	0.209	0.025	0.012
EN113 28D-1g	2.27924	0.912262	3.0639	0.548324	3.791	0.792365	2.46296	0.346889	2.2714	0.346928	1.82731	0.246468	0.0224041	0.00862407
ALV0981-R023	2.922	1.133	3.721	0.684	4.621	0.965	2.88		2.739	0.418	2.284		0.082	0.026
EWI0004-002-001	1.75	0.657	2.63	0.512	3.47	0.823	2.31	0.372	2.48	0.39	1.17	0.1392	0.046	0.02
END0113-026-001	1.61	0.725	2.51	0.472	3.3	0.765	2.31	0.41	2.31	0.354	1.08	0.248	0.058	0.008
EN112 7D-2	2.00179	0.877328	3.11652	0.559891	3.84159	0.812615	2.6474	0.349605	2.55119	0.331233	1.39472	0.143282	0.0205559	0.00945157
NHOCHEP-116-003	2.538	1.023	3.74418	0.709	4.585	1.008	2.99963		2.852	0.423	1.945	0.286	0.076	0.028
SON0026-178-K146G
Sample_ID	87Sr/86Sr	143Nd/144Nd	206Pb/204Pb	207Pb/204Pb	208Pb/204Pb	176Hf/177Hf	Latitude	Longitute	Elevation	Tectonic Setting		Expedition
END0113-013-001	0.70249	0.513107	18.402	15.501	37.82	0.283147	-24.86	-112.45	-2948	SPREADING_CENTER		EN113
END0113-038-011	0.702398	0.513156	18.367	15.509	37.835	0.283203	-23.08	-114.54	-3125	SPREADING_CENTER		EN113
END0113-030-010							-24.11	-115.41	-2800	SPREADING_CENTER		EN113
ENV7123-3-5							48.517	-128.917	2377	SPREADING_CENTER
END0113-030-001	0.702285	0.513229	17.86	15.437	37.349	0.283307	-24.11	-115.41	-2800	SPREADING_CENTER		EN113
END0113-040-001	0.702798	0.513053	18.415	15.512	37.918	0.28311	-24.61	-111.95	-2825	SPREADING_CENTER		EN113
END0113-005-010							-27.21	-112.77	-2632	SPREADING_CENTER		EN113
END0113-026-010							-25.28	-116.27	-2052	SPREADING_CENTER		EN113
EN113 28D-1g							-24.64	-116.42	2700	SPREADING_CENTER
ALV0981-R023							20.833	-109.1	-2615	SPREADING_CENTER		ALVIN 0981
EWI0004-002-001	0.70299	0.512965	18.975	15.579	38.581	0.283096	1.589	-90.821	-3210	SPREADING_CENTER		EW0004
END0113-026-001	0.702289	0.513277	17.594	15.401	37.057	0.283329	-25.28	-116.27	-2052	SPREADING_CENTER		EN113
EN112 7D-2							-32.12	-112.27	2500	SPREADING_CENTER
NHOCHEP-116-003	0.70239	0.513175	18.348	15.482	37.771		12.2	-103.842	-2638.5	SPREADING_CENTER		CHEPR
SON0026-178-K146G							-18.53	-113.41	-2625	SPREADING_CENTER		SO026
